# Supplementary material for: Controlling variables and emission factors of methane from global rice fields
Source: Copernicus journal article supplement (doi:10.5194/acp-18-10419-2018), 2018-07-23
Supplement: Supplementary file 1 [file acp-18-10419-2018-supplement.zip]

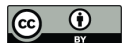

*Supplement of*

## **Controlling variables and emission factors of methane from global rice fields**

**Jinyang Wang et al.**

*Correspondence to:* Xiaoyuan Yan (yanxy@issas.ac.cn)

- acp-18-10419-2018-supplement-title-page.pdf
- Data Set 1.xlsx

The copyright of individual parts of the supplement might differ from the CC BY 4.0 License.
