# Supplementary material for: Controlling variables and emission factors of methane from global rice fields
Source: Copernicus journal article supplement (doi:10.5194/acp-18-10419-2018), 2018-07-23
Supplement: Supplementary file 2 [file acp-18-10419-2018-supplement.zip]

Archive with 2 entries (2 files):
- Data Set 1.xlsx
- acp-18-10419-2018-supplement-title-page.pdf
